# Supplementary material for: Comparative Transcriptome Profile of the Cytoplasmic Male Sterile and Fertile Floral Buds of Radish (Raphanus sativus L.)
Source: MDPI journal article supplement (doi:10.3390/ijms17010042), 2016-01-06
Supplement: s1 [file s1]

# Supplementary Materials: Comparative Transcriptome Profile of the Cytoplasmic Male Sterile and Fertile Floral Buds of Radish (*Raphanus sativus* L.)

Shiyong Mei, Touming Liu and Zhiwei Wang

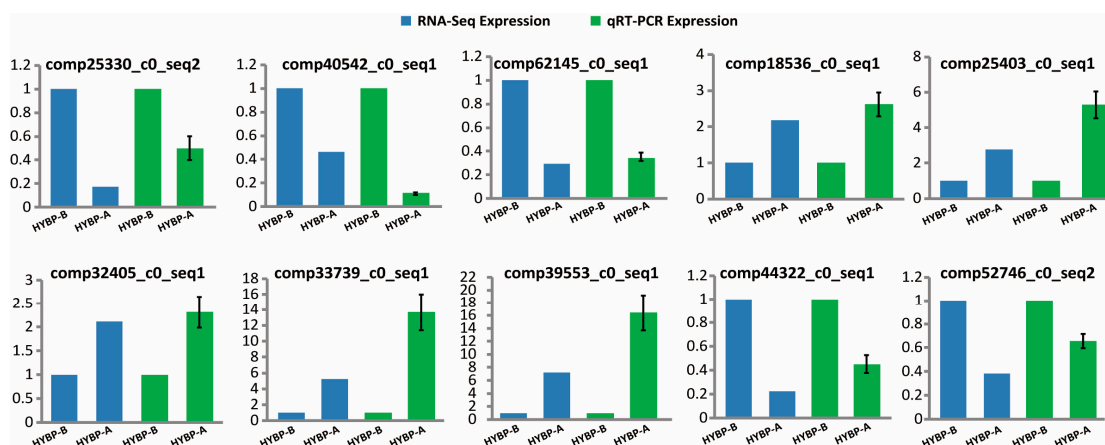

**Figure S1.** qRT-PCR verification of differentially expressed genes. RNA-Seq expression data come from one sample of HYBP-A and HYBP-B. Transcript levels from qRT-PCR were normalized to the actin gene and given as fold change compared with HYBP-B. Error bars represent SEM (standard error of mean) derived from three technical repeats.

**Table S1.** Primers for qRT-PCR.

| Genes                    | qRT-PCR Primers                               |
|--------------------------|-----------------------------------------------|
| <i>comp25330_c0_seq2</i> | TTCAGACGCAGATTCGTCAC<br>TTCAAGGACATTGCGGTTGG  |
| <i>comp40542_c0_seq1</i> | TCATTATTTTCATGCGCCAAC<br>AAGGCAGGAAGACAAGATCG |
| <i>comp62145_c0_seq1</i> | AATCAATCCCAGCACAATCC<br>TGTGTCAGCATTGGTCAGTT  |
| <i>comp18536_c0_seq1</i> | TGCTGCTTGAGATGTTGGAC<br>CGAAGAAGAACCGGATGAAA  |
| <i>comp25403_c0_seq1</i> | GGGTTTCGAGCTTGTCTCAA<br>TCCACAGATGAGCAGAGTCG  |
| <i>comp32405_c0_seq1</i> | ACCGGTTCGTGACATTAACA<br>ACAAAACCTACCCCCAACCAG |
| <i>comp33739_c0_seq1</i> | ACCCTCATCGACAATCCAAG<br>CCCGTTGAAAATGAATCCAG  |
| <i>comp39553_c0_seq1</i> | CACGACAGTCAGGAAGCTCA<br>AAGTTCGACAAACGGTCAC   |
| <i>comp44322_c0_seq1</i> | TGGAACCGAGGGTATGATG<br>ATTCAATCACCACAGCACCA   |
| <i>comp52746_c0_seq2</i> | GATCCTCCTCCGTCGAAGAC<br>TCAAGCGAAAGTTCGTAGCC  |
